# Supplementary material for: A multicentric prospective observational study of diagnosis and prognosis features in ICU mesenteric ischemia: the DIAGOMI study
Source: PubMed Central journal article supplement (PMC9759607; doi:10.1186/s13613-022-01092-8), 2022-12-17
Supplement: 13613_2022_1092_MOESM1_ESM.pdf [file 13613_2022_1092_MOESM1_ESM.pdf]

# **A multicentric prospective observational study of diagnosis and prognosis features in ICU mesenteric ischemia: the DIAGOMI study**

Simon Bourcier, Guillaume Ulmann, Matthieu Jamme, Guillaume Savary, Marine Paul, Sarah Benghanem, Jean-Rémi Lavillegrand, Matthieu Schmidt, Charles-Edouard Luyt, Eric Maury, Alain Combes, Frédéric Pène, Nathalie Neveu, Alain Cariou

## **Additional file**

### **Inclusion and Exclusion criteria**

#### **Criteria defining NOMI and Necrosis Diagnosis**

**Table S1.** Demographic and inclusion criteria among patients with defined and ruled out NOMI

**Table S2.** Demographic and inclusion criteria among patients with gastrointestinal failure with defined and ruled out intestinal necrosis

**Table S3.** Digestive, biological parameters and CT results among patients with defined and ruled out NOMI

**Table S4.** Description of prognosis features according to ICU survival of patients with definite intestinal necrosis

**Table S5.** Description of prognosis features according to ICU survival of patients with NOMI

**Table S6.** Cox proportional hazards model univariable analysis of ICU-mortality associated factors in patients with definite NOMI

**Table S7.** Description of surgical and endoscopic findings for patients with definite necrosis

**Table S8.** Amount of missing data for each biological variable

## **Inclusion and Exclusion criteria**

Patients were enrolled in the study if NOMI was clinically suspected by physicians in charge and based on prespecified inclusion criteria and absence of exclusion criteria. The presence of at least two **inclusion criteria** was necessary among:

- A new-onset or worsening circulatory failure requiring catecholamines
- Digestive signs of gastrointestinal dysfunction(22): abdominal pain, diarrhea, upper or lower digestive hemorrhage, vomiting or gastric residual>300ml, abdominal distension
- Biological signs evoking tissue ischemia or acute cell lysis: arterial lactate value > 2 mmol/l, increase of serum LDH, creatin kinase or aspartate transaminase.
- Contrast enhanced abdominal CT-scan signs of mesenteric ischemia: bowel-wall thickening or thinning with distension, lack of parietal enhancement, pneumatosis intestinalis and portal venous gas.

Patients were not involved in the study if they had surgical past of extensive bowel resection, an obvious differential diagnosis explaining the clinical worsening or a withholding for the diagnosis and therapeutic workup (endoscopy and laparoscopy with surgical bowel resection).

## Criteria defining NOMI and Necrosis Diagnosis

| Diagnosis of NOMI if one criteria among                                                                                                                                                                                                                                            | Exclusion of NOMI                                                                          |
|------------------------------------------------------------------------------------------------------------------------------------------------------------------------------------------------------------------------------------------------------------------------------------|--------------------------------------------------------------------------------------------|
| <b>CT scan signs of mesenteric ischemia:</b> <ul style="list-style-type: none"> <li>• Bowel-wall thickening / thinning with distension</li> <li>• Lack of parietal enhancement</li> <li>• Parietal pneumatosis</li> <li>• Portal gas</li> </ul>                                    | <b>Two negative investigations</b><br>among CT scan, gastrointestinal endoscopy or surgery |
| <b>Gastrointestinal endoscopy</b> grade 1, 2 or 3 <ul style="list-style-type: none"> <li>• Grade 1: mucosal oedema and erythema</li> <li>• Grade 2: non-necrotic ulcerations on an oedematous mucosa</li> <li>• Grade 3: necrosis with grey-black mucosal discoloration</li> </ul> |                                                                                            |
| <b>Surgery</b> with macroscopic findings of mesenteric ischemia                                                                                                                                                                                                                    |                                                                                            |

| Diagnosis of Intestinal Necrosis if one criteria among                                      | Exclusion of Intestinal Necrosis                                                                                     |
|---------------------------------------------------------------------------------------------|----------------------------------------------------------------------------------------------------------------------|
| <b>Gastrointestinal endoscopy:</b> necrosis with grey-black mucosal discoloration (grade 3) | <b>Two negative investigations</b> for the presence of necrosis among CT scan, gastrointestinal endoscopy or surgery |
| <b>Surgery</b> with macroscopic findings of intestinal necrosis                             |                                                                                                                      |

**Table S1. Demographic and inclusion criteria among patients****with defined and ruled out NOMI**

| Characteristics                        | Total<br>(n=61)  | Ruled out NOMI<br>(n=8) | Definite NOMI<br>(n=33) | P<br>value |
|----------------------------------------|------------------|-------------------------|-------------------------|------------|
| <b>At ICU admission</b>                |                  |                         |                         |            |
| Age (years)                            | 63.5 [56.5–68.9] | 65.9 [58.8–73.0]        | 60.7 [56.0–67.6]        | 0.41       |
| SAPS II                                | 71 [54–77]       | 54 [46–76]              | 71 [55–85]              | 0.24       |
| Males                                  | 38 (62.3)        | 5 (62.5)                | 19 (57.6)               | 1          |
| Body mass index (kg/m <sup>2</sup> )   | 27.2 [23.8–29.4] | 26.6 [23.7–28.6]        | 27.2 [23.9–30.0]        | 0.59       |
| SOFA                                   | 12 [9–16]        | 11 [5–15]               | 15 [11–17]              | 0.18       |
| <b>Comorbidities</b>                   |                  |                         |                         |            |
| Diabetes                               | 12 (19.7)        | 2 (25.0)                | 4 (12.1)                | 0.58       |
| Hypertension                           | 33 (54.1)        | 5 (62.5)                | 15 (45.5)               | 0.45       |
| Smoking                                | 29 (47.5)        | 4 (50.0)                | 15 (45.5)               | 1          |
| Coronary disease                       | 19 (31.1)        | 4 (50.0)                | 8 (24.2)                | 0.20       |
| Peripheral arterial disease            | 10 (16.4)        | 4 (50.0)                | 3 (9.1)                 | 0.02       |
| End Stage Renal Disease                | 2 (3.3)          | 0 (0.0)                 | 1 (3.0)                 | 1          |
| Atrial fibrillation                    | 12 (19.7)        | 2 (25.0)                | 6 (18.2)                | 0.64       |
| <b>Main diagnosis at ICU admission</b> |                  |                         |                         | 0.53       |
| Cardiogenic shock                      | 20 (32.8)        | 4 (50.0)                | 10 (30.3)               |            |
| Septic shock                           | 15 (24.6)        | 1 (12.5)                | 8 (24.2)                |            |
| ARDS                                   | 10 (16.4)        | 1 (12.5)                | 7 (21.2)                |            |
| Cardiac arrest                         | 5 (8.2)          | 0 (0.0)                 | 3 (9.1)                 |            |
| Hypovolemic shock                      | 4 (6.6)          | 2 (25.0)                | 2 (6.1)                 |            |
| Other                                  | 7 (11.5)         | 0 (0.0)                 | 3 (9.1)                 |            |
| <b>At inclusion</b>                    |                  |                         |                         |            |
| Time to inclusion (Days)               | 5.7 [1.6–10.6]   | 4.1 [2.1–6.8]           | 5.9 [1.6–10.5]          | 0.41       |
| SOFA at inclusion                      | 16 [11–19]       | 13 [9–16]               | 18 [14–20]              | 0.06       |
| Norepinephrin dose (µg/Kg/mn)          | 0.72 [0.20–1.93] | 0.34 [0.18–0.51]        | 1.39 [0.44–1.93]        | 0.02       |

|                                                         |           |                 |                |      |
|---------------------------------------------------------|-----------|-----------------|----------------|------|
| Venous arterial ECMO                                    | 21 (34.4) | 2 (25.0)        | 15 (45.5)      | 0.43 |
| Mechanical ventilation                                  | 51 (83.6) | 6 (75.0)        | 29 (87.9)      | 0.58 |
| RRT                                                     | 43 (70.5) | 4 (50.0)        | 26 (78.8)      | 0.18 |
| <b>Nutrition route last 24 hours</b>                    |           |                 |                | 1    |
| 0                                                       | 40 (65.6) | 5 (62.5)        | 20 (60.6)      |      |
| Enteral                                                 | 19 (31.1) | 3 (37.5)        | 12 (36.4)      |      |
| Parenteral                                              | 2 (3.3)   | 0 (0.0)         | 1 (3.0)        |      |
| <b>Number of inclusion criteria</b>                     |           |                 |                | 0.08 |
| 2                                                       | 21 (34.4) | 4 (50.0)        | 6 (18.2)       |      |
| 3                                                       | 29 (47.5) | 4 (50.0)        | 16 (48.5)      |      |
| 4                                                       | 11 (18.0) | 0 (0.0)         | 11 (33.3)      |      |
| <b>Inclusion criteria</b>                               |           |                 |                |      |
| Digestive manifestations                                | 47 (77.0) | 8 (100)         | 28 (84.8)      | 0.56 |
| Shock or worsening of shock                             | 55 (90.2) | 6 (75.0)        | 30 (90.9)      | 0.25 |
| Biological signs                                        | 56 (91.8) | 6 (75.0)        | 32 (97.0)      | 0.09 |
| CT signs                                                | 15 (24.6) | 0 (0.0)         | 14 (42.4)      | 0.04 |
| <b>Time between Inclusion and<br/>Diagnosis (Hours)</b> | –         | 13.4 [4.1–22.8] | 4.1 [0.0–25.4] | 0.37 |

Results are expressed as median [interquartile range] or *n* (%). SAPS II = Simplified Acute Physiology Score II, ICU = Intensive Care Unit, SOFA = Sequential Organ-Failure Assessment, ARDS = Acute Respiratory Distress Syndrome, RRT = Renal Replacement Therapy, CT = Computed Tomography

**Table S2. Demographic and inclusion criteria among patients with gastrointestinal failure with defined and ruled out intestinal necrosis**

| Characteristics         | Gastrointestinal failure<br>( <i>n</i> =54) | Ruled out necrosis<br>( <i>n</i> =13) | Definite necrosis<br>( <i>n</i> =27) | <i>P</i><br>value* |
|-------------------------|---------------------------------------------|---------------------------------------|--------------------------------------|--------------------|
| <b>At ICU admission</b> |                                             |                                       |                                      |                    |
| Age (years)             | 60.6 [56.4–68.0]                            | 63.8 (59.2–72.2)                      | 60.7 (55.8–67.6)                     | 0.48               |
| SAPS II                 | 71 [53–81]                                  | 54 [47–77]                            | 72 [55–85]                           | 0.23               |

|                                        |                  |                  |                  |      |
|----------------------------------------|------------------|------------------|------------------|------|
| Males                                  | 32 (59.3)        | 9 (69.2)         | 14 (51.9)        | 0.33 |
| Body mass index (kg/m <sup>2</sup> )   | 27.0 [23.8–29.4] | 24.5 [23.8–28.2] | 27.2 [24.8–30.1] | 0.09 |
| SOFA                                   | 12 [9–16]        | 14 [5–16]        | 15 [11–18]       | 0.26 |
| <b>Comorbidities</b>                   |                  |                  |                  |      |
| Diabetes                               | 9 (16.7)         | 2 (15.4)         | 3 (11.1)         | 1    |
| Hypertension                           | 29 (53.7)        | 6 (46.2)         | 13 (48.1)        | 1    |
| Smoking                                | 27 (50.0)        | 6 (46.2)         | 12 (44.4)        | 1    |
| Coronary disease                       | 17 (31.5)        | 5 (38.5)         | 7 (25.9)         | 0.48 |
| Peripheral arterial disease            | 9 (16.7)         | 4 (30.8)         | 3 (11.1)         | 0.19 |
| End Stage Renal Disease                | 1 (1.9)          | 0 (0.0)          | 1 (3.7)          | 1    |
| Atrial fibrillation                    | 10 (18.5)        | 2 (15.4)         | 5 (18.5)         | 1    |
| <b>Main diagnosis at ICU admission</b> |                  |                  |                  | 0.71 |
| Cardiogenic shock                      | 18 (33.3)        | 5 (38.4)         | 8 (29.6)         |      |
| Septic shock                           | 11 (20.4)        | 1 (7.7)          | 6 (22.2)         |      |
| ARDS                                   | 9 (16.7)         | 2 (15.4)         | 4 (14.8)         |      |
| Cardiac arrest                         | 5 (9.3)          | 2 (15.4)         | 1 (3.7)          |      |
| Hypovolemic shock                      | 4 (7.4)          | 2 (15.4)         | 2 (7.4)          |      |
| Other                                  | 7 (13.0)         | 1 (7.7)          | 2 (7.4)          |      |
| <b>At inclusion</b>                    |                  |                  |                  |      |
| Time to inclusion (Days)               | 5.7 [1.6–10.3]   | 2.7 [0.9–6.5]    | 7.0 [2.7–10.7]   | 0.03 |
| SOFA at inclusion                      | 16 [10–20]       | 14 [9–18]        | 18 [16–20]       | 0.01 |
| Norepinephrin (μg/Kg/mn)               | 0.65 [0.19–1.83] | 0.46 [0.24–0.87] | 1.54 [0.51–2.20] | 0.02 |
| Venous arterial ECMO                   | 19 (35.2)        | 3 (23.1)         | 14 (51.9)        | 0.10 |
| Mechanical ventilation                 | 44 (81.5)        | 10 (76.9)        | 25 (92.6)        | 0.31 |
| RRT                                    | 36 (66.7)        | 7 (53.8)         | 23 (85.2)        | 0.05 |
| <b>Nutrition route last 24 hours</b>   |                  |                  |                  | 0.44 |
| None                                   | 34 (63.0)        | 8 (61.5)         | 16 (60.7)        |      |
| Enteral                                | 18 (33.3)        | 4 (30.8)         | 11 (39.3)        |      |
| Parenteral                             | 2 (3.7)          | 1 (7.7)          | 0 (0.0)          |      |
| <b>Number of inclusion criteria</b>    |                  |                  |                  | 0.02 |

|                                                                   |           |               |                |       |
|-------------------------------------------------------------------|-----------|---------------|----------------|-------|
| 2                                                                 | 15 (27.8) | 5 (38.5)      | 5 (18.5)       |       |
| 3                                                                 | 28 (51.9) | 8 (61.5)      | 11 (40.7)      |       |
| 4                                                                 | 11 (20.4) | 0 (0.0)       | 11 (40.7)      |       |
| <b>Inclusion criteria</b>                                         |           |               |                |       |
| Digestive manifestations                                          | 47 (87.0) | 12 (92.3)     | 23 (85.2)      | 1     |
| Shock or worsening of shock                                       | 48 (88.9) | 10 (76.9)     | 25 (92.6)      | 0.31  |
| Biological signs                                                  | 49 (90.7) | 11 (84.6)     | 26 (96.3)      | 0.24  |
| CT signs                                                          | 16 (29.6) | 1 (7.7)       | 14 (51.9)      | 0.006 |
| <b>Time between Inclusion and<br/>Certainty Diagnosis (Hours)</b> | –         | 20.6 [7.5–35] | 2.8 [0.0–13.9] | 0.02  |

Results are expressed as median [interquartile range] or *n* (%). \**P*-value is presented for statistical comparison of ruled out and definite necrosis. SAPS II = Simplified Acute Physiology Score II, ICU = Intensive Care Unit, SOFA = Sequential Organ-Failure Assessment, ARDS = Acute Respiratory Distress Syndrome, RRT = Renal Replacement Therapy, CT = Computed Tomography

**Table S3. Digestive, biological parameters and CT results among patients with defined and ruled out NOMI**

| <b>Characteristics</b>                                     | <b>Total<br/>(n=61)</b> | <b>Ruled out NOMI<br/>(n=8)</b> | <b>Definite NOMI<br/>(n=33)</b> | <b><i>P</i><br/>value</b> |
|------------------------------------------------------------|-------------------------|---------------------------------|---------------------------------|---------------------------|
| <b>Digestive manifestation criteria</b>                    | 47 (77.0)               | 8 (100)                         | 28 (84.8)                       | 0.56                      |
| Upper digestive hemorrhage                                 | 4 (6.6)                 | 1 (12.5)                        | 2 (6.1)                         | 0.49                      |
| Vomiting, residual gastric volume*                         | 24 (39.3)               | 3 (37.5)                        | 15 (45.5)                       | 1                         |
| Lower digestive hemorrhage                                 | 15 (24.6)               | 5 (62.5)                        | 10 (30.3)                       | 0.12                      |
| Diarrhea                                                   | 31 (50.8)               | 5 (62.5)                        | 16 (48.5)                       | 0.69                      |
| Abdominal pain                                             | 22 (36.1)               | 2 (25.0)                        | 12 (36.4)                       | 0.69                      |
| Abdominal distension                                       | 17 (27.9)               | 0 (0.0)                         | 15 (45.5)                       | 0.02                      |
| <b>Worst 24 hr biological findings prior<br/>inclusion</b> |                         |                                 |                                 |                           |

|                                        |                   |                  |                   |       |
|----------------------------------------|-------------------|------------------|-------------------|-------|
| Leukocyte count (G/L)                  | 18.7 [9.9–26.2]   | 10.1 [9.4–15.4]  | 19.2 [9.5–25.0]   | 0.43  |
| Platelets (G/L)                        | 108 [60–214]      | 134 [104–219]    | 82 [44–160]       | 0.11  |
| Arterial lactate, mmol/L               | 5.9 [3.0–10.3]    | 2.8 [1.0–4.2]    | 6.8 [4.1–12.8]    | 0.005 |
| Arterial pH                            | 7.32 [7.22–7.42]  | 7.44 [7.28–7.49] | 7.32 [7.14–7.40]  | 0.02  |
| Bicarbonates, mmol/L                   | 19.0 [13.4–21.6]  | 20.9 [19.7–23.5] | 15.7 [11.6–19.9]  | 0.006 |
| Potassium, mmol/L                      | 4.6 [3.9–5.3]     | 4.1 [3.5–4.8]    | 4.7 [4.4–5.4]     | 0.06  |
| Aspartate transaminase (IU/L)          | 200 [66–836]      | 58 [41–102]      | 266 [103–1183]    | 0.03  |
| Alanine transaminase (IU/L)            | 130 [51–492]      | 52 [33–97]       | 157 [90–768]      | 0.04  |
| Bilirubine (µmol/L)                    | 44 [14–128]       | 21 [16–43]       | 61 [14–142]       | 0.46  |
| LDH (IU/L)                             | 805 [452–2380]    | 402 [360–549]    | 1372 [601–3329]   | 0.006 |
| CPK (IU/L)                             | 676 [150–2391]    | 377 [74–638]     | 1734 [444–6044]   | 0.03  |
| Procalcitonin (µg/L)                   | 6.4 [2.0–17.2]    | 2.5 [0.9–6.8]    | 9.4 [4.6–24.9]    | 0.15  |
| <b>Positive blood culture</b>          | 18 (29.5)         | 1 (12.5)         | 10 (30.3)         | 0.41  |
| <b>Candidemia</b>                      | 5 (8.2)           | 0 (0.0)          | 3 (9.1)           | 1     |
| <b>Specific Biomarkers</b>             |                   |                  |                   |       |
| Plasma I-FABP (pg/mL)                  | 3136 [1160–13034] | 1070 [748–1234]  | 6110 [2060–24243] | 0.002 |
| Plasma citrulline (µmol/mL)            | 22 [14–35]        | 21 [12–42]       | 22 [16–30]        | 0.70  |
| Plasma arginine (µmol/mL)              | 43 [30–66]        | 57 [42–63]       | 40 [29–76]        | 0.33  |
| Plasma citrulline/arginine ratio       | 0.47 [0.27–0.69]  | 0.34 [0.19–0.71] | 0.49 [0.38–0.66]  | 0.36  |
| <b>CT findings</b>                     |                   |                  |                   |       |
| Abnormal wall enhancement              | 15 (30.0)         | 0 (0.0)          | 13 (50)           | 0.01  |
| Pneumatosis intestinalis               | 5 (10.0)          | 0 (0.0)          | 4 (15.4)          | 0.55  |
| Bowel dilation                         | 17 (34.0)         | 0 (0.0)          | 14 (53.8)         | 0.01  |
| Portal venous gas                      | 2 (4.0)           | 0 (0.0)          | 2 (7.7)           | 1     |
| Atherosclerosis of mesenteric arteries | 16 (32.0)         | 3 (37.5)         | 7 (26.9)          | 0.66  |

Results are expressed as median [interquartile range] or *n* (%). \*Residual gastric volume was considered if ≥300mL. CT = Computed Tomography

**Table S4. Description of prognosis features according to ICU survival of patients with definite intestinal necrosis**



|                                                 | <b>Non-survivors</b> | <b>Survivors</b> | <b>P</b>     |
|-------------------------------------------------|----------------------|------------------|--------------|
| <b>Characteristics of Necrosis Population</b>   | <b>(n=22)</b>        | <b>(n=5)</b>     | <b>value</b> |
| Age (years)                                     | 64 [57–68]           | 52 [46–56]       | 0.11         |
| SOFA at day of suspicion                        | 19 [16–20]           | 17 [17–20]       | 0.94         |
| Time between ICU admission and inclusion (Days) | 6.3 [2.7–10.3]       | 17.5 [9.1–17.9]  | 0.15         |
| Time between Inclusion and Diagnosis (Hours)    | 1.3 [0.0–15.8]       | 4.1 [2.8–9.5]    | 0.40         |
| <b>Biological parameters</b>                    |                      |                  |              |
| Lactate (mmol/L)                                | 6.8 [4.2–14.1]       | 6.3 [3.5–7.3]    | 0.18         |
| LDH (IU/L)                                      | 2289 [877–5716]      | 1053 [601–1307]  | 0.17         |
| CPK (IU/L)                                      | 1881 [1041–9354]     | 864 [493–1538]   | 0.31         |
| Aspartate transaminase (IU/L)                   | 389 [104–1799]       | 220 [159–767]    | 0.69         |
| Procalcitonin (µg/L)                            | 11.1 [5.2–24.4]      | 11.9 [8.6–16.3]  | 0.86         |
| <b>Positive blood cultures</b>                  | 6 (27.3)             | 2 (40)           | 0.62         |
| <b>Specific biomarkers</b>                      |                      |                  |              |
| Plasma I-FABP (pg/mL)                           | 10384 [3120–38334]   | 2140 [2060–4092] | 0.01         |
| Plasma I-FABP in patients with laparotomy       | 6022 [2073–35613]    | 2140 [2060–4092] | 0.07         |
| Plasma I-FABP in patients with resection        | 14201 [2767–40820]   | 2140 [2060–4092] | 0.07         |
| Citrulline (µmol/mL)                            | 19 [15–33]           | 18 [18–24]       | 0.76         |
| Arginine (µmol/mL)                              | 47 [29–77]           | 36 [31–43]       | 0.34         |
| Plasma citrulline/arginine ratio                | 0.45 [0.28–0.65]     | 0.56 [0.50–0.57] | 0.54         |
| <b>Organ supports at inclusion</b>              |                      |                  |              |
| Norepinephrin (µg/Kg/mn)                        | 1.7 [0.7–2.5]        | 0.1 [0.0–1.7]    | 0.05         |
| Venous arterial ECMO                            | 11 (50)              | 3 (60.0)         | 0.68         |
| Mechanical ventilation                          | 18 (94.7)            | 4 (80.0)         | 1            |
| RRT                                             | 18 (94.7)            | 4 (80.0)         | 1            |
| <b>Surgical treatment</b>                       |                      |                  |              |
| Resection                                       | 8/22 (36.4)          | 5/5 (100)        | 0.02         |
| Resection delay from suspicion (h)              | 11.7 [4.8–82.9]      | 8.2 [2.8–9.5]    | 0.1          |

Results are expressed as median [interquartile range] or *n* (%). SOFA = Sequential Organ-Failure Assessment, RRT = Renal Replacement Therapy

**Table S5. Description of prognosis features according to ICU survival of patients with NOMI**

|                                                     | Non-survivors<br>(n=23) | Survivors<br>(n=10) | P<br>value |
|-----------------------------------------------------|-------------------------|---------------------|------------|
| <b>Characteristics of Ischemia Population</b>       |                         |                     |            |
| Age (years)                                         | 63 [56–68]              | 59 [53–71]          | 0.80       |
| SAPS 2                                              | 74 [54–88]              | 62 [55–79]          | 0.43       |
| Time between ICU admission and inclusion (Days)     | 5.9 [2.2–10.0]          | 5.9 [0.7–15.5]      | 0.93       |
| SOFA at inclusion                                   | 19 [16–20]              | 16 [11–19]          | 0.13       |
| <b>Time between Inclusion and Diagnosis (Hours)</b> | 2.1 [0.0–21.9]          | 10.3 [3.2–24.8]     | 0.25       |
| <b>Biomarkers</b>                                   |                         |                     |            |
| Plasma I-FABP (pg/mL)                               | 10790 [3125–37266]      | 2488 [1566–4352]    | 0.04       |
| Plasma citrulline (μmol/L)                          | 20 [15–32]              | 24 [18–29]          | 0.91       |
| Plasma arginine (μmol/L)                            | 43 [30–76]              | 38 [30–49]          | 0.34       |
| Plasma citrulline/arginine ratio                    | 0.45 [0.30–0.62]        | 0.56 [0.43–0.70]    | 0.65       |
| <b>Necrosis</b>                                     |                         |                     |            |
| None                                                | 1 (4.3)                 | 4 (40.0)            | 0.02       |
| Yes                                                 | 22 (95.7)               | 6 (60.0)            |            |
| <b>Organ supports</b>                               |                         |                     |            |
| Norepinephrin dose (μg/Kg/mn)                       | 1.54 [0.75–2.46]        | 0.53 [0.03–1.59]    | 0.03       |
| Venous arterial ECMO                                | 11 (47.8)               | 4 (40.0)            | 0.72       |
| Mechanical ventilation                              | 22 (95.7)               | 7 (70.0)            | 0.07       |
| RRT                                                 | 20 (87.0)               | 6 (60.0)            | 0.16       |

Results are expressed as median [interquartile range] or *n* (%). SAPS II = Simplified Acute Physiology Score II, SOFA = Sequential Organ-Failure Assessment, RRT = Renal Replacement Therapy

**Table S6. Cox proportional hazards model univariable analysis of ICU-mortality associated factors in patients with definite NOMI**

| Characteristics of NOMI Population            | CSH  | 95% CI    | P value |
|-----------------------------------------------|------|-----------|---------|
| Age (>10 years)                               | 1.10 | 0.81–1.51 | 0.50    |
| SAPS 2                                        | 1.01 | 0.99–1.03 | 0.50    |
| SOFA at inclusion                             | 1.09 | 0.98–1.21 | 0.11    |
| <b>Arterial Lactate (mmol/L) at inclusion</b> | 1.13 | 1.03–1.23 | 0.007   |
| <b>Biomarkers</b>                             |      |           |         |
| Plasma I-FABP (pg/mL, +1000 units)            | 1.02 | 1.01–1.03 | 0.003   |
| Plasma citrulline (μmol/L)                    | 1.0  | 0.97–1.03 | 0.91    |
| Plasma arginine (μmol/L)                      | 1.01 | 1.0–1.02  | 0.11    |
| Plasma citrulline/arginine ratio              | 1.06 | 0.51–2.22 | 0.90    |
| <b>Necrosis</b>                               | 6.45 | 0.87–48.0 | 0.07    |
| <b>Organ supports</b>                         |      |           |         |
| Norepinephrin dose (μg/Kg/mn)                 | 1.31 | 1.11–1.56 | 0.002   |
| Mechanical ventilation                        | 5.14 | 0.69–38.3 | 0.11    |
| RRT                                           | 2.36 | 0.70–7.97 | 0.20    |

CSH = Cause-Specific Hazard ratio, SAPS II = Simplified Acute Physiology Score II, SOFA = Sequential Organ-Failure Assessment, RRT = Renal Replacement Therapy

**Table S7. Description of surgical and endoscopic findings for patients with gastrointestinal necrosis**

| Findings                                  | N (%)   |
|-------------------------------------------|---------|
| <b>Necrosis location*</b>                 |         |
| Stomach and/or duodenum                   | 6 (25)  |
| Jejunum and/or ileum                      | 10 (42) |
| Right colon                               | 11 (46) |
| Left colon                                | 16 (67) |
| Rectum                                    | 12 (50) |
| <b>Extensive (≥2 intestinal segments)</b> | 17 (71) |

|                    |        |
|--------------------|--------|
| <b>Peritonitis</b> | 8 (30) |
|--------------------|--------|

\*Necrosis location was missing for 3 patients leading to present frequencies of necrosis location for 24 patients

**Table S8. Missing values**

| <b>Characteristics</b>             | <b>Total<br/>(n=61)</b> | <b>Ruled out<br/>necrosis</b> | <b>Definite<br/>necrosis</b> | <b>Ruled out<br/>Ischemia</b> | <b>Definite<br/>Ischemia</b> |
|------------------------------------|-------------------------|-------------------------------|------------------------------|-------------------------------|------------------------------|
| <b>Worst 24 hr prior inclusion</b> |                         |                               |                              |                               |                              |
| <b>biological findings</b>         |                         |                               |                              |                               |                              |
| Leukocyte count (G/L)              | 0                       | 0                             | 0                            | 0                             | 0                            |
| Platelets (G/L)                    | 0                       | 0                             | 0                            | 0                             | 0                            |
| Arterial lactate, mmol/L           | 0                       | 0                             | 0                            | 0                             | 0                            |
| Arterial pH                        | 0                       | 0                             | 0                            | 0                             | 0                            |
| Bicarbonates, mmol/L               | 0                       | 0                             | 0                            | 0                             | 0                            |
| Potassium, mmol/L                  | 0                       | 0                             | 0                            | 0                             | 0                            |
| Aspartate transaminase (IU/L)      | 0                       | 0                             | 0                            | 0                             | 0                            |
| Alanine transaminase (IU/L)        | 0                       | 0                             | 0                            | 0                             | 0                            |
| Bilirubine (µmol/L)                | 0                       | 0                             | 0                            | 0                             | 0                            |
| LDH (IU/L)                         | 5                       | 0                             | 4                            | 0                             | 4                            |
| CPK (IU/L)                         | 8                       | 0                             | 6                            | 0                             | 6                            |
| Procalcitonin (µg/L)               | 13                      | 4                             | 4                            | 4                             | 4                            |
| <b>Positive blood culture</b>      | 0                       | 0                             | 0                            | 0                             | 0                            |
| <b>Candidemia</b>                  | 0                       | 0                             | 0                            | 0                             | 0                            |
| <b>Specific Biomarkers</b>         |                         |                               |                              |                               |                              |
| Plasma I-FABP (pg/mL)              | 0                       | 0                             | 0                            | 0                             | 0                            |
| Plasma citrulline (µmol/mL)        | 0                       | 0                             | 0                            | 0                             | 0                            |
| Plasma arginine (µmol/mL)          | 0                       | 0                             | 0                            | 0                             | 0                            |
